# Supplementary material
Source: PubMed Central journal article supplement (PMC3572291)
Supplement: NIHMS428118-supplement-Supp_Fig_S1-S6.pdf [file NIHMS428118-supplement-Supp_Fig_S1-S6.pdf]

|                                |                               |                                |                                |                                |                                |                                |                                 |
|--------------------------------|-------------------------------|--------------------------------|--------------------------------|--------------------------------|--------------------------------|--------------------------------|---------------------------------|
| Gapd<br>1                      | NM_025319.1 <sup>a</sup><br>2 | Gtf2f2<br>3                    | NM_001001176 <sup>a</sup><br>4 | Tcea3<br>5                     | Abt1<br>6                      | Supt4h2<br>7                   | NM_025617.1 <sup>a</sup><br>8   |
| Brf1<br>9                      | Supt4h<br>10                  | Tbpl1<br>11                    | Gtf2a2<br>12                   | Tcfec<br>13                    | Usf1<br>14                     | Tcf4<br>15                     | Srebf1<br>16                    |
| Atf4<br>17                     | Tfam<br>18                    | Lhx8<br>19                     | Gbx2<br>20                     | Hoxc13<br>21                   | Og2x<br>22                     | Hoxa7<br>23                    | Isl2<br>24                      |
| NM_029418.2 <sup>a</sup><br>25 | Nr2e1<br>26                   | Tbx10<br>27                    | Sart1<br>28                    | NM_178667.2 <sup>a</sup><br>29 | Srf<br>30                      | Irf3<br>31                     | Ig/EBP-1<br>32                  |
| Nfyc<br>33                     | Spry1<br>34                   | Tcfcp2<br>35                   | Tbx3<br>36                     | Spic<br>37                     | Rbl1<br>38                     | Mef2d<br>39                    | Tardbp<br>40                    |
| Nfil3<br>41                    | E2f4<br>42                    | Ski<br>43                      | Tcfcp2l2<br>44                 | Mltt3<br>45                    | Nfkb1<br>46                    | Tada2l<br>47                   | AK009337.1 <sup>a</sup><br>48   |
| Morf4l1<br>49                  | BC021878.1 <sup>a</sup><br>50 | Crsp9<br>51                    | NM_026348.2 <sup>a</sup><br>52 | Ddit3<br>53                    | Yaf2<br>54                     | Crsp7<br>55                    | AK078881.1 <sup>a</sup><br>56   |
| Eil3<br>57                     | Lhx8<br>58                    | BC027395.1 <sup>a</sup><br>59  | Zfp426<br>60                   | BC027395.1 <sup>a</sup><br>61  | BC011426 <sup>a</sup><br>62    | Zfp111<br>63                   | Zfp27<br>64                     |
| Zfp99<br>65                    | mkr5<br>66                    | Lpp<br>67                      | BC057025.1 <sup>a</sup><br>68  | Zfp35<br>69                    | Zfp535<br>70                   | AK045871.1 <sup>a</sup><br>71  | Mtf1<br>72                      |
| NM_194351.1 <sup>a</sup><br>73 | Zfp143<br>74                  | Zfp398<br>75                   | Zfp90<br>76                    | Zfp31<br>77                    | AI326800<br>78                 | Tieg3<br>79                    | AK005257.1 <sup>a</sup><br>80   |
| BC038178.1 <sup>a</sup><br>81  | Gata3<br>82                   | BC029122.1 <sup>a</sup><br>83  | Rnf5<br>84                     | Zfp148<br>85                   | Limd1<br>86                    | Csrp2bp<br>87                  | BC066020.1 <sup>a</sup><br>88   |
| Isl2<br>89                     | Phf15<br>90                   | NM_029418.2 <sup>a</sup><br>91 | Zfp11<br>92                    | Zfp108<br>93                   | Zfp7<br>94                     | Zfp297<br>95                   | Rnf141<br>96                    |
| Zfp513<br>97                   | Hdac10<br>98                  | AK048807.1 <sup>a</sup><br>99  | Rab37<br>100                   | Freq<br>101                    | AK036696.1 <sup>a</sup><br>102 | AK078423.1 <sup>a</sup><br>103 | NM_175398.3 <sup>a</sup><br>104 |
| AK020728.1 <sup>a</sup><br>105 | Prss2<br>106                  | AK016954.1 <sup>a</sup><br>107 | Olf1r571<br>108                | Pde5a<br>109                   | Agtr1<br>110                   | Viaat<br>111                   | Mt4<br>112                      |
| H1foo<br>113                   | Blank<br>114                  | PUC18<br>115                   | Blank<br>116                   | Blank<br>117                   | AS1R2<br>118                   | AS1R1<br>119                   | AS1<br>120                      |
| Rps27a<br>121                  | B2m<br>122                    | Hspcb<br>123                   | Hspcb<br>124                   | Ppia<br>125                    | Ppia<br>126                    | BAS2C<br>127                   | BAS2C<br>128                    |

**Figure S1**

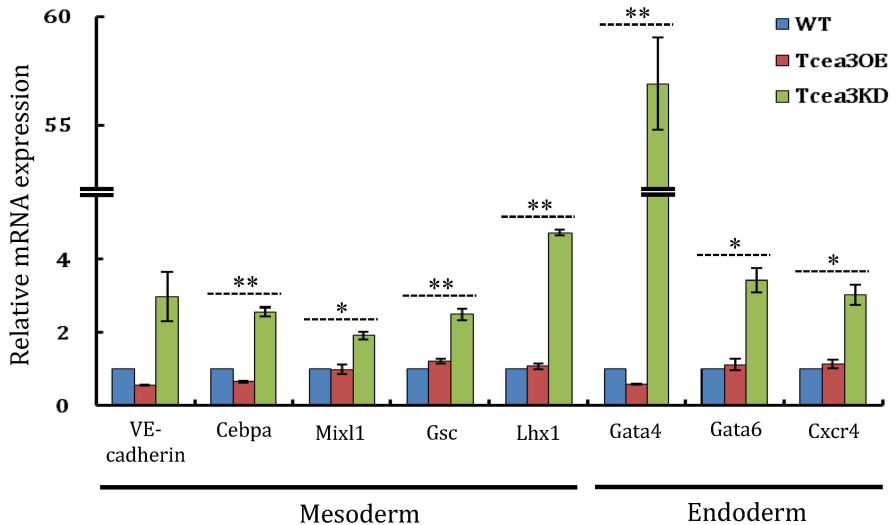

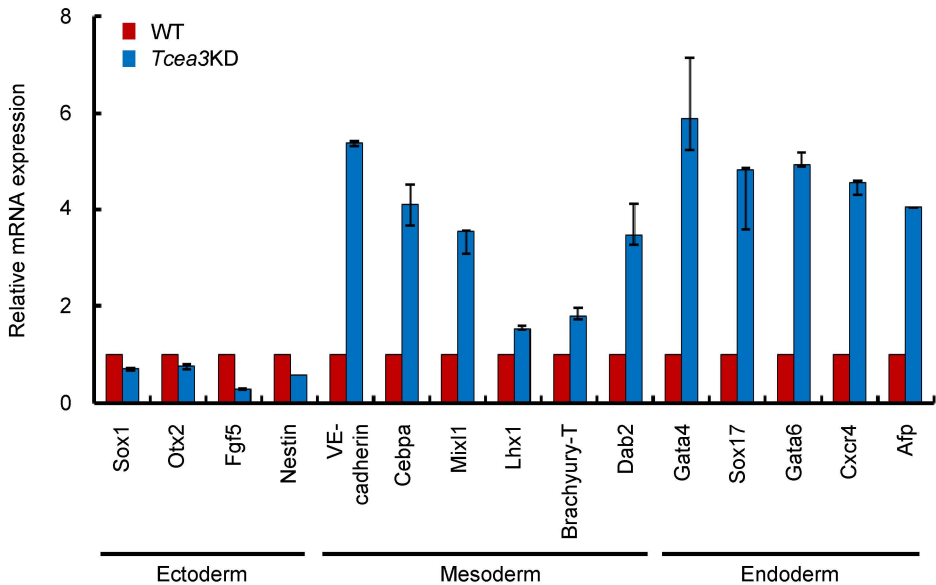

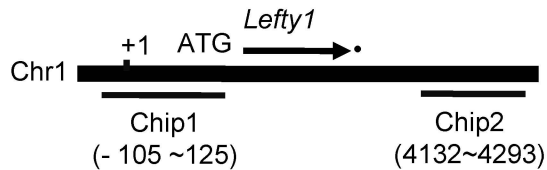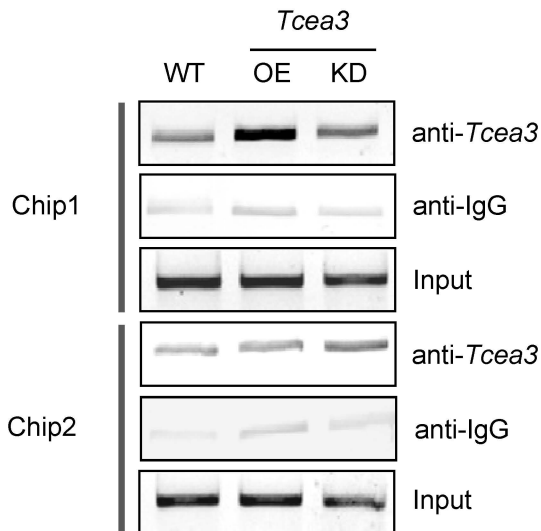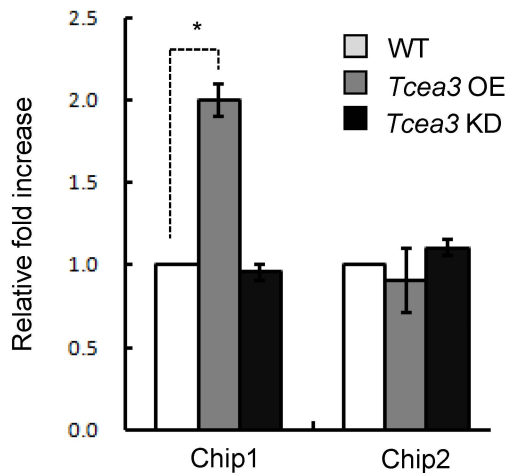

**A**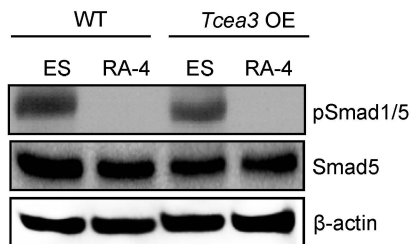**B**

|      | Fold OE/WT | P value |
|------|------------|---------|
| BMP4 | 0.72       | 0       |
| ID1  | 1.76       | 0.88    |
| ID2  | 1.22       | 0.14    |
| ID3  | 0.85       | 0.51    |

**C**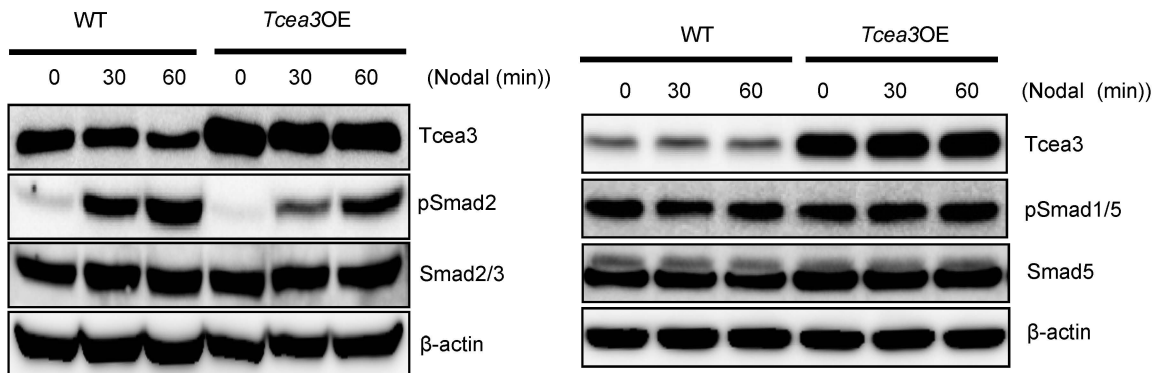

---

| SYMBOL | DEFINITION                                                  | ACCESSION           | Fold change<br>( <i>Tcea3</i> OE/WT) |
|--------|-------------------------------------------------------------|---------------------|--------------------------------------|
| Anxa2  | annexin A2                                                  | <u>NM_007585</u>    | -2.00                                |
| Mfge8  | milk fat globule-EGF factor 8 protein, transcript variant 2 | <u>NM_001045489</u> | -2.16                                |
| Vegfa  | vascular endothelial growth factor A, transcript variant 2  | <u>NM_009505</u>    | -2.18                                |
| Traf6  | Tnf receptor-associated factor 6                            | <u>NM_009424</u>    | -2.37                                |
| Pcsk6  | proprotein convertase subtilisin/kexin type 6               | <u>XM_919493</u>    | -2.40                                |
| Tuft1  | tuftelin 1                                                  | <u>NM_011656</u>    | -2.46                                |
| Fos    | FBJ osteosarcoma oncogene                                   | <u>NM_010234</u>    | -3.48                                |

---
