# Supplementary material
Source: PubMed Central journal article supplement (PMC3572291)
Supplement: NIHMS428118-supplement-Supp_Table_S1.pdf [file NIHMS428118-supplement-Supp_Table_S1.pdf]

**Table S1. Representative proteins specifically identified as a binding partner of *Tcea3* in mESCs**

| Gene<br>accession no | Protein name                                   | Amino acid sequences by MS/MS analysis |                      |       |                            |
|----------------------|------------------------------------------------|----------------------------------------|----------------------|-------|----------------------------|
|                      |                                                | Peptide MW<br>(expt)                   | Peptide MW<br>(calc) | Score | Peptide Sequence           |
| IPI00320034          | DNA-directed RNA<br>polymerase II subunit RPB2 | 942.5246                               | 942.5247             | 79.63 | AGVSQVLNR                  |
|                      |                                                | 1136.6782                              | 1136.6778            | 37.83 | ARGPIQILNR                 |
|                      |                                                | 1403.5812                              | 1403.5809            | 49.37 | DGAPSPMMPNEAR              |
|                      |                                                | 1773.854                               | 1773.8533            | 81.27 | GEIGDATPFNDAVNVQK          |
|                      |                                                | 1325.6364                              | 1325.6364            | 66.87 | GNEVLYNGFTGR               |
|                      |                                                | 909.5395                               | 909.5396             | 56.1  | GPIQILNR                   |
|                      |                                                | 953.439                                | 953.4389             | 54.1  | GTCGIQYR                   |
|                      |                                                | 1230.6716                              | 1230.6721            | 62.85 | IPQIGDKFASR                |
|                      |                                                | 1686.8232                              | 1685.8777            | 63.74 | ITSQIFIGPTYQR              |
|                      |                                                | 1016.6275                              | 1016.627             | 45    | IVATLPYIK                  |
|                      |                                                | 2798.3607                              | 2796.3566            | 44.23 | IVEDAPPIDLQAEAQHASGEVEEPPR |
|                      |                                                | 1708.844                               | 1708.842             | 69.76 | KGFDQEEVFEKPTR             |
|                      |                                                | 1239.6457                              | 1239.6459            | 55.76 | LDDDGLIAPGVR               |
|                      |                                                | 1259.6225                              | 1259.622             | 62.22 | MATNTVYVFAK                |
|                      |                                                | 1057.6241                              | 1057.6244            | 41.17 | NKTQISLVR                  |
|                      |                                                | 1596.841                               | 1596.8399            | 69.55 | NLTYSAPLYVDITK             |
|                      |                                                | 1212.7225                              | 1212.723             | 54.52 | QEVPIIVFR                  |
|                      |                                                | 1894.9751                              | 1894.9748            | 50.37 | TVIKEGEEQLQTQHQQ           |
|                      |                                                | 2274.1327                              | 2273.1288            | 105.4 | VSANKGEIGDATPFNDAVNVQK     |

|             |                                            |           |           |        |                       |
|-------------|--------------------------------------------|-----------|-----------|--------|-----------------------|
|             |                                            | 1001.539  | 1001.5393 | 51.55  | VSGDDVIIGK            |
|             |                                            | 1338.6208 | 1338.6204 | 85.54  | YSLATGNWGDQK          |
| IPI00317794 | Nucleolin                                  | 843.5067  | 843.5065  | 42.23  | ALELTGLK              |
|             |                                            | 1122.5439 | 1122.5444 | 38.48  | ETLEEVFEK             |
|             |                                            | 1560.6738 | 1560.6733 | 68.01  | GFGFVDFNSEEDAK        |
|             |                                            | 939.5064  | 939.5065  | 50.35  | GIAYIEFK              |
|             |                                            | 1002.5093 | 1002.5094 | 59.84  | LELQGSNSR             |
|             |                                            | 999.5348  | 999.5349  | 71.6   | NDLAVVDVR             |
|             |                                            | 1361.631  | 1361.631  | 45.62  | SEADAENKLEEK          |
|             |                                            | 2188.0255 | 2188.0243 | 46.2   | SEADAENKLEEKQGAIDGR   |
|             |                                            | 1145.5609 | 1145.5604 | 42.01  | SVSLYTGK              |
|             |                                            | 1486.7414 | 1486.7416 | 67.91  | SVSLYTGKQGR           |
|             |                                            | 1372.7428 | 1372.7422 | 78.45  | TIRLELQGSNSR          |
|             |                                            | 1395.7622 | 1395.7609 | 91.18  | TLVLSNLSYSATK         |
|             |                                            | 2287.148  | 2287.1485 | 85.68  | VEGSEPTTFFNLFIGNLNPNK |
| IPI00109401 | RNA polymerase II-<br>Associated protein 3 | 1551.8485 | 1551.8481 | 46.53  | GIAADRTNALLPANR       |
|             |                                            | 1675.7726 | 1674.7672 | 76.26  | GMDADPYNPVLPTNR       |
|             |                                            | 1698.8794 | 1698.8788 | 103.83 | IEAVSDTSAPQAQGVK      |
|             |                                            | 968.5409  | 968.5403  | 43.42  | TNALLPANR             |
|             |                                            | 1888.9234 | 1888.9214 | 78.45  | VLELEPDNFEATNELR      |
| IPI00230035 | ATP-dependent RNA<br>helicase DDX3X        | 1127.6445 | 1127.6438 | 55.97  | DLLDLLVEAK            |
|             |                                            | 1237.5431 | 1237.5431 | 72.09  | DLMACAQTGSGK          |
|             |                                            | 1794.78   | 1794.7769 | 68.83  | DYRQSSGASSSFSSSR      |
|             |                                            | 1549.6688 | 1549.6685 | 66.52  | GFYDKDSSGWSSSK        |
|             |                                            | 1121.5216 | 1121.5214 | 60.9   | GRGDYDGIGGR           |

|             |                             |           |           |        |                                   |
|-------------|-----------------------------|-----------|-----------|--------|-----------------------------------|
|             |                             | 851.4209  | 851.4211  | 47.67  | IGLDFCK                           |
|             |                             | 1172.575  | 1172.5747 | 44.51  | IVEQDTMPPK                        |
|             |                             | 1484.7657 | 1484.7657 | 56.82  | IVEQDTMPPKGVR                     |
|             |                             | 1484.8712 | 1484.8715 | 62     | KQYPISLVLAPTR                     |
|             |                             | 1367.6218 | 1367.6214 | 50.32  | MLDMGFEPQIR                       |
|             |                             | 1360.586  | 1360.5855 | 47.96  | QSSGASSSSFSSSR                    |
|             |                             | 1356.7773 | 1356.7765 | 63.14  | QYPISLVLAPTR                      |
|             |                             | 1328.6761 | 1328.6758 | 50     | RIVEQDTMPPK                       |
|             |                             | 1640.8663 | 1640.8668 | 42.41  | RIVEQDTMPPKGVR                    |
|             |                             | 926.4608  | 926.461   | 50.98  | SGFGKFER                          |
|             |                             | 1439.8465 | 1439.846  | 57.49  | SGKSPILVATAVAAR                   |
|             |                             | 1168.701  | 1167.6975 | 104.83 | SPILVATAVAAR                      |
|             |                             | 1523.7738 | 1523.7732 | 78.51  | VGNLGLATSEFFNER                   |
|             |                             | 1901.9995 | 1900.9942 | 70.32  | VRPCVVYGGAEIGQQIR                 |
|             |                             | 1271.687  | 1271.6874 | 54.59  | VWVVEEIDKR                        |
| IPI00307837 | Elongation factor 1-alpha 1 | 1331.7262 | 1331.7231 | 46.71  | DMRQTVAVGVK                       |
|             |                             | 1313.7346 | 1313.7343 | 61.37  | EHALLAYTLGVK                      |
|             |                             | 1154.5271 | 1154.5277 | 42.93  | FEKEAAEMGK                        |
|             |                             | 1024.6017 | 1024.603  | 63.64  | IGGIGTVPVGR                       |
|             |                             | 3600.6612 | 3598.6537 | 50.29  | IGYNPDTVAFVPISGWNGDNMLEPSANMPWFK  |
|             |                             | 3122.6497 | 3121.6441 | 67.78  | KDGSASGTTLEALDCILPPTRPTDKPLR      |
|             |                             | 3728.7541 | 3726.7487 | 50.23  | KIGYNPDTVAFVPISGWNGDNMLEPSANMPWFK |
|             |                             | 974.545   | 974.5437  | 55.47  | LPLQDVYK                          |
|             |                             | 1297.5494 | 1297.5496 | 53.71  | MDSTEPPYSQK                       |
|             |                             | 1453.6515 | 1453.6507 | 52.83  | MDSTEPPYSQKR                      |

|             |                           |           |           |       |                               |
|-------------|---------------------------|-----------|-----------|-------|-------------------------------|
|             |                           | 2926.4381 | 2924.426  | 60.82 | NMITGTSQADCAVLIVAAGVGEFEAGISK |
|             |                           | 869.534   | 869.5334  | 44.7  | QLIVGVNK                      |
|             |                           | 2150.0819 | 2149.0725 | 71.37 | QLIVGVNKMDSTEPPYSQK           |
|             |                           | 2306.1891 | 2305.1736 | 51.26 | QLIVGVNKMDSTEPPYSQKR          |
|             |                           | 913.5617  | 913.5597  | 60.7  | QTVAVGVK                      |
|             |                           | 1755.9464 | 1755.9407 | 82.96 | RYEEIVKEVSTYIK                |
|             |                           | 3027.3953 | 3026.3824 | 73.56 | SGDAAIVDMVPGKPMCVESFSDYPPLGR  |
|             |                           | 1119.5937 | 1119.5924 | 51.08 | STTTGHLIYK                    |
|             |                           | 1625.7995 | 1625.797  | 72.97 | TIEKFEKEAAEMGK                |
|             |                           | 2530.3751 | 2530.3717 | 45.08 | VETGVLKPGMVVTFAPVNVTTTEVK     |
|             |                           | 1599.8441 | 1599.8396 | 81.42 | YEEIVKEVSTYIK                 |
|             |                           | 1727.9387 | 1727.9345 | 94.75 | YEEIVKEVSTYIKK                |
|             |                           | 1403.7208 | 1403.7197 | 62.76 | YYVTIIDAPGHR                  |
|             |                           | 1907.9992 | 1906.9941 | 59    | YYVTIIDAPGHRDFIK              |
| IPI00318841 | Elongation factor 1-gamma | 2357.0257 | 2356.0198 | 70.45 | AAAPAPEEEMDECEQALAAEPK        |
|             |                           | 1540.7329 | 1540.731  | 39.83 | AAGTLYTYPENWR                 |
|             |                           | 1693.9405 | 1692.9311 | 65.89 | AFKALIAAQYSGAQVR              |
|             |                           | 1122.622  | 1122.6186 | 40.29 | AKDPFAHLPK                    |
|             |                           | 1346.7311 | 1346.7306 | 88.53 | ALIAAQYSGAQVR                 |
|             |                           | 1714.8003 | 1713.7787 | 64.88 | EYFSWEGTFQHVGK                |
|             |                           | 805.3971  | 805.397   | 41.8  | FAESQPK                       |
|             |                           | 2688.2394 | 2686.234  | 51.65 | GQELAFPLSPDWQVDYESYTW         |
|             |                           | 1121.6821 | 1121.6808 | 76.43 | ILGLLDTHLK                    |
|             |                           | 2501.1273 | 2500.1097 | 75.32 | KAAAPAPEEEMDECEQALAAEPK       |
|             |                           | 1571.8159 | 1571.8155 | 42.48 | KLDPGSEETQTLVR                |
|             |                           | 1443.7213 | 1443.7205 | 80.88 | LDPGSEETQTLVR                 |

|             |                                                        |           |           |       |                       |
|-------------|--------------------------------------------------------|-----------|-----------|-------|-----------------------|
|             |                                                        | 946.4612  | 946.4621  | 50.74 | QAFPNTNR              |
|             |                                                        | 2537.2093 | 2537.2386 | 42.29 | QAFPNTNRWFLTCINQPQFR  |
|             |                                                        | 1245.6205 | 1245.6201 | 50.11 | QATENAKEEVK           |
|             |                                                        | 1401.7217 | 1401.7212 | 48.73 | QATENAKEEVKR          |
|             |                                                        | 1277.7834 | 1277.7819 | 62.78 | RILGLLDTHLK           |
|             |                                                        | 1240.6449 | 1240.6452 | 56.28 | STFVLDEFKR            |
|             |                                                        | 821.4485  | 820.4443  | 38.29 | TFLVGER               |
|             |                                                        | 1077.5957 | 1077.5931 | 41.92 | TRTFLVGER             |
|             |                                                        | 1707.8786 | 1706.8641 | 63.32 | VLSAPPHFHFGQTNR       |
|             |                                                        | 1608.7875 | 1608.7871 | 62.47 | WFLTCINQPQFR          |
| IPI00226073 | Isoform 1 of Heterogeneous nuclear ribonucleoprotein F | 1996.9555 | 1995.969  | 66.83 | ATENDIYNFFSPLNPVR     |
|             |                                                        | 1615.6803 | 1615.6759 | 69.32 | DLSYCLSGMYDHR         |
|             |                                                        | 1629.7165 | 1629.7132 | 88.93 | HSGPNSADSANDGFVR      |
|             |                                                        | 1868.9437 | 1866.9363 | 90.05 | ITGEAFVQFASQELAEK     |
|             |                                                        | 1780.8092 | 1780.8003 | 72.99 | QSGEAFVELESEDDVK      |
|             |                                                        | 1400.6877 | 1400.6871 | 39.41 | SHRTEMDWVLK           |
|             |                                                        | 2207.0112 | 2207.0052 | 52.89 | VTGEADVEFATHEEAVAAMSK |
|             |                                                        | 2227.9515 | 2226.9423 | 47.41 | YGDSEFTVQSTTGHCVHMR   |
