# Supplementary material
Source: PubMed Central journal article supplement (PMC3572291)
Supplement: NIHMS428118-supplement-Supp_Table_S2.pdf [file NIHMS428118-supplement-Supp_Table_S2.pdf]

| SYMBOL        | ACCESSION                    | Pval_T/J1 | Fold_T/J1 | SD_T/J1 |
|---------------|------------------------------|-----------|-----------|---------|
| Lefty1        | <a href="#">NM_010094</a>    | 0.04      | 6.38      | 0.10    |
| Tcea3         | <a href="#">NM_011542</a>    | 0.00      | 6.19      | 0.11    |
| Calml4        | <a href="#">NM_138304</a>    | 0.00      | 5.54      | 0.10    |
| S100a6        | <a href="#">NM_011313</a>    | 0.00      | 5.38      | 0.09    |
| Spink3        | <a href="#">NM_009258</a>    | 0.00      | 4.65      | 0.11    |
| Eef1d         | <a href="#">NM_029663</a>    | 0.00      | 4.60      | 0.06    |
| Krt17         | <a href="#">NM_010663</a>    | 0.00      | 4.44      | 0.06    |
| Hopx          | <a href="#">NM_175606</a>    | 0.01      | 4.27      | 0.03    |
| Cmtm4         | <a href="#">NM_153582</a>    | 0.00      | 4.23      | 0.08    |
| 2310043J07Rik | <a href="#">XM_916650</a>    | 0.00      | 3.76      | 0.07    |
| Psmb10        | <a href="#">NM_013640</a>    | 0.00      | 3.60      | 0.10    |
| 2410004A20Rik | <a href="#">NM_025890</a>    | 0.00      | 3.58      | 0.09    |
| Dscr6         | <a href="#">NM_133229</a>    | 0.00      | 3.49      | 0.16    |
| Lypd2         | <a href="#">NM_026671</a>    | 0.01      | 3.26      | 0.06    |
| Slc38a5       | <a href="#">NM_172479</a>    | 0.04      | 3.21      | 0.05    |
| Fkbp6         | <a href="#">AK090036</a>     | 0.02      | 3.19      | 0.20    |
| Kcnk1         | <a href="#">NM_008430</a>    | 0.00      | 3.13      | 0.16    |
| Olfir985      | <a href="#">NM_146855</a>    | 0.00      | 3.10      | 0.05    |
| 9130604K18Rik | <a href="#">AK078977</a>     | 0.00      | 3.09      | 0.13    |
| Taf15         | <a href="#">NM_027427</a>    | 0.00      | 3.07      | 0.12    |
| Isyna1        | <a href="#">NM_023627</a>    | 0.00      | 2.95      | 0.09    |
| 4930524J08Rik |                              | 0.00      | 2.94      | 0.04    |
| Notum         | <a href="#">NM_175263</a>    | 0.00      | 2.93      | 0.04    |
| LOC381904     | <a href="#">XM_358675</a>    | 0.00      | 2.92      | 0.06    |
| Retsat        | <a href="#">NM_026159</a>    | 0.00      | 2.83      | 0.08    |
| Tlcd1         | <a href="#">NM_026708</a>    | 0.00      | 2.78      | 0.09    |
| Fcgr2b        | <a href="#">NM_010187</a>    | 0.00      | 2.73      | 0.08    |
| 1190002F15Rik |                              | 0.00      | 2.72      | 0.14    |
| LOC384836     | <a href="#">XM_357889</a>    | 0.01      | 2.70      | 0.21    |
| 1700019D03Rik | <a href="#">NM_144953</a>    | 0.00      | 2.70      | 0.05    |
| Pfn1          | <a href="#">NM_011072</a>    | 0.01      | 2.70      | 0.07    |
| 2010204K13Rik | <a href="#">AK008437</a>     | 0.00      | 2.69      | 0.12    |
| Acs15         | <a href="#">NM_027976</a>    | 0.00      | 2.68      | 0.09    |
| Dhcr24        | <a href="#">NM_053272</a>    | 0.01      | 2.66      | 0.07    |
| 1600002K03Rik | <a href="#">NM_027207</a>    | 0.01      | 2.66      | 0.06    |
| Grhl2         | <a href="#">NM_026496</a>    | 0.00      | 2.65      | 0.05    |
| Mospd3        | <a href="#">NM_030037</a>    | 0.00      | 2.64      | 0.13    |
| Slc25a45      | <a href="#">NM_134154</a>    | 0.00      | 2.63      | 0.03    |
| Tmem42        | <a href="#">NM_025339</a>    | 0.00      | 2.63      | 0.13    |
| Zfp423        | <a href="#">NM_033327</a>    | 0.00      | 2.63      | 0.12    |
| Plekha4       | <a href="#">NM_148927</a>    | 0.00      | 2.61      | 0.04    |
| Mfap5         | <a href="#">NM_015776</a>    | 0.04      | 2.60      | 0.11    |
| Ahcy          | <a href="#">NM_016661</a>    | 0.00      | 2.60      | 0.09    |
| Gng13         | <a href="#">NM_022422</a>    | 0.00      | 2.60      | 0.04    |
| Dhrs4         | <a href="#">NM_001037938</a> | 0.00      | 2.59      | 0.06    |
| 1600002K03Rik | <a href="#">NM_027207</a>    | 0.00      | 2.59      | 0.13    |
| Mest          | <a href="#">NM_008590</a>    | 0.01      | 2.57      | 0.08    |
| Max           | <a href="#">NM_008558</a>    | 0.00      | 2.56      | 0.03    |
| Nme7          | <a href="#">NM_138314</a>    | 0.00      | 2.56      | 0.12    |
| AU015836      | <a href="#">XR_035182</a>    | 0.00      | 2.51      | 0.10    |
| Tmem54        | <a href="#">NM_025452</a>    | 0.00      | 2.51      | 0.15    |
| Etv4          | <a href="#">NM_008815</a>    | 0.00      | 2.50      | 0.05    |
| Cenpm         | <a href="#">NM_025639</a>    | 0.00      | 2.50      | 0.12    |
| LOC216674     | <a href="#">XM_126090</a>    | 0.00      | 2.49      | 0.03    |
| Dctn1         | <a href="#">NM_007835</a>    | 0.00      | 2.47      | 0.16    |

|               |                              |      |      |      |
|---------------|------------------------------|------|------|------|
| N6amt2        | <a href="#">NM_026526</a>    | 0.00 | 2.47 | 0.11 |
| A630072M18Rik |                              | 0.00 | 2.47 | 0.13 |
| Ddc           | <a href="#">NM_016672</a>    | 0.00 | 2.47 | 0.11 |
| Cenpm         | <a href="#">NM_178269</a>    | 0.02 | 2.46 | 0.04 |
| Zmat4         | <a href="#">NM_177086</a>    | 0.02 | 2.45 | 0.05 |
| Rangrf        | <a href="#">NM_021329</a>    | 0.01 | 2.45 | 0.09 |
| D030070L09Rik | <a href="#">NM_172625</a>    | 0.00 | 2.44 | 0.06 |
| Olfr985       | <a href="#">NM_146855</a>    | 0.01 | 2.44 | 0.06 |
| Rpo1-4        | <a href="#">NM_009088</a>    | 0.00 | 2.43 | 0.09 |
| C330016K18Rik | <a href="#">XM_132642</a>    | 0.00 | 2.42 | 0.15 |
| Aass          | <a href="#">NM_013930</a>    | 0.00 | 2.41 | 0.10 |
| LOC666559     | <a href="#">XR_031145</a>    | 0.00 | 2.39 | 0.07 |
| Lgals3        | <a href="#">NM_010705</a>    | 0.00 | 2.39 | 0.04 |
| 2400009B08Rik | <a href="#">XM_358687</a>    | 0.00 | 2.39 | 0.19 |
| Nnat          | <a href="#">NM_010923</a>    | 0.00 | 2.38 | 0.05 |
| Nanos3        | <a href="#">NM_194059</a>    | 0.00 | 2.37 | 0.10 |
| Pramel4       | <a href="#">NM_001001319</a> | 0.04 | 2.37 | 0.06 |
| Rab25         | <a href="#">NM_016899</a>    | 0.00 | 2.36 | 0.14 |
| Cad           | <a href="#">NM_023525</a>    | 0.00 | 2.36 | 0.09 |
| Slc7a7        | <a href="#">NM_011405</a>    | 0.00 | 2.36 | 0.11 |
| Cenpm         | <a href="#">NM_178269</a>    | 0.00 | 2.35 | 0.09 |
| Gstt2         | <a href="#">AK079739</a>     | 0.00 | 2.35 | 0.06 |
| Nme4          | <a href="#">NM_019731</a>    | 0.05 | 2.33 | 0.07 |
| Eno3          | <a href="#">NM_007933</a>    | 0.02 | 2.31 | 0.09 |
| Derl3         | <a href="#">NM_024440</a>    | 0.00 | 2.29 | 0.04 |
| Elmo1         | <a href="#">NM_198093</a>    | 0.00 | 2.29 | 0.18 |
| 1810054D07Rik | <a href="#">NM_027238</a>    | 0.00 | 2.27 | 0.12 |
| 9130221D24Rik | <a href="#">NM_029953</a>    | 0.02 | 2.27 | 0.08 |
| LOC100045780  | <a href="#">XM_001475019</a> | 0.00 | 2.27 | 0.07 |
| Snrpg         | <a href="#">NM_026506</a>    | 0.00 | 2.26 | 0.05 |
| 1700013A01Rik | <a href="#">AK005934</a>     | 0.00 | 2.26 | 0.11 |
| A730063M14Rik |                              | 0.00 | 2.25 | 0.17 |
| S100a10       | <a href="#">NM_009112</a>    | 0.00 | 2.24 | 0.17 |
| Emd           | <a href="#">NM_007927</a>    | 0.00 | 2.24 | 0.04 |
| Raly          | <a href="#">NM_023130</a>    | 0.00 | 2.24 | 0.08 |
| 4930553M18Rik | <a href="#">NM_026541</a>    | 0.00 | 2.23 | 0.32 |
| B130065G19Rik | <a href="#">AK045321</a>     | 0.00 | 2.23 | 0.06 |
| 2810407C02Rik | <a href="#">NM_001040396</a> | 0.00 | 2.23 | 0.03 |
| 2010309E21Rik | <a href="#">XM_357858</a>    | 0.00 | 2.21 | 0.09 |
| Cxcl16        | <a href="#">NM_023158</a>    | 0.01 | 2.20 | 0.19 |
| Nme4          | <a href="#">NM_019731</a>    | 0.00 | 2.19 | 0.04 |
| Cbx5          | <a href="#">NM_001076789</a> | 0.02 | 2.19 | 0.01 |
| Nudt21        | <a href="#">NM_026623</a>    | 0.04 | 2.19 | 0.24 |
| LOC100045567  | <a href="#">XM_001474536</a> | 0.00 | 2.19 | 0.01 |
| Islr2         | <a href="#">NM_177193</a>    | 0.00 | 2.18 | 0.08 |
| Chchd4        | <a href="#">NM_133928</a>    | 0.00 | 2.18 | 0.06 |
| Kndc1         | <a href="#">NM_177261</a>    | 0.00 | 2.16 | 0.03 |
| Dok2          | <a href="#">NM_010071</a>    | 0.04 | 2.16 | 0.03 |
| A730063M14Rik |                              | 0.00 | 2.16 | 0.04 |
| D11Ert636e    | <a href="#">NM_026682</a>    | 0.01 | 2.16 | 0.11 |
| Slc27a2       | <a href="#">NM_011978</a>    | 0.00 | 2.16 | 0.05 |
| Zfp423        | <a href="#">NM_033327</a>    | 0.00 | 2.16 | 0.13 |
| Ccne1         | <a href="#">NM_007633</a>    | 0.04 | 2.16 | 0.10 |
| D630023F18Rik | <a href="#">NM_175293</a>    | 0.00 | 2.15 | 0.02 |
| Hnrpa0        | <a href="#">XM_001001311</a> | 0.01 | 2.14 | 0.15 |
| Ceacam20      | <a href="#">NM_027839</a>    | 0.04 | 2.13 | 0.15 |

|                  |                              |      |       |      |
|------------------|------------------------------|------|-------|------|
| Alox5ap          | <a href="#">NM_009663</a>    | 0.00 | 2.13  | 0.17 |
| AK122525         | <a href="#">NM_199028</a>    | 0.00 | 2.13  | 0.09 |
| Dhrs4            | <a href="#">NM_001037938</a> | 0.01 | 2.12  | 0.08 |
| Scd2             | <a href="#">NM_009128</a>    | 0.03 | 2.12  | 0.24 |
| Tia1             | <a href="#">NM_011585</a>    | 0.00 | 2.11  | 0.15 |
| Ccdc50           | <a href="#">NM_026202</a>    | 0.00 | 2.11  | 0.05 |
| Ruvbl1           | <a href="#">NM_019685</a>    | 0.00 | 2.11  | 0.14 |
| 2810428I15Rik    | <a href="#">XM_147329</a>    | 0.00 | 2.10  | 0.09 |
| Dusp11           | <a href="#">NM_028099</a>    | 0.02 | 2.10  | 0.12 |
| Plod3            |                              | 0.00 | 2.09  | 0.06 |
| Rhobtb2          | <a href="#">NM_153514</a>    | 0.00 | 2.09  | 0.09 |
| 1190005I06Rik    | <a href="#">NM_197988</a>    | 0.00 | 2.08  | 0.07 |
| Gstt2            | <a href="#">NM_010361</a>    | 0.03 | 2.08  | 0.16 |
| Aven             | <a href="#">NM_028844</a>    | 0.00 | 2.08  | 0.09 |
| D730042P09Rik    | <a href="#">AK021335</a>     | 0.00 | 2.07  | 0.04 |
| Rps27a           | <a href="#">NM_001033865</a> | 0.00 | 2.07  | 0.14 |
| LOC384315        | <a href="#">XM_357564</a>    | 0.00 | 2.06  | 0.08 |
| 1700024G13Rik    | <a href="#">XM_147820</a>    | 0.00 | 2.06  | 0.18 |
| Ubl4             | <a href="#">NM_145405</a>    | 0.00 | 2.06  | 0.11 |
| Aqp3             | <a href="#">NM_016689</a>    | 0.00 | 2.06  | 0.12 |
| Ubx1             | <a href="#">NM_024432</a>    | 0.00 | 2.06  | 0.13 |
| Cul1             | <a href="#">AK040053</a>     | 0.04 | 2.06  | 0.08 |
| Bst2             | <a href="#">NM_198095</a>    | 0.00 | 2.05  | 0.27 |
| Scarb2           | <a href="#">NM_007644</a>    | 0.00 | 2.05  | 0.05 |
| Mras             | <a href="#">NM_008624</a>    | 0.04 | 2.05  | 0.04 |
| Myl2             | <a href="#">NM_010861</a>    | 0.02 | 2.05  | 0.12 |
| Hsd17b14         | <a href="#">NM_025330</a>    | 0.00 | 2.05  | 0.15 |
| Ilf3             | <a href="#">NM_001042708</a> | 0.05 | 2.04  | 0.02 |
| Ampd1            | <a href="#">NM_001033303</a> | 0.00 | 2.04  | 0.18 |
| Lin28            |                              | 0.00 | 2.04  | 0.02 |
| Ushbp1           | <a href="#">NM_181418</a>    | 0.00 | 2.04  | 0.21 |
| Fxn              | <a href="#">NM_008044</a>    | 0.00 | 2.04  | 0.19 |
| Phf19            | <a href="#">NM_028716</a>    | 0.00 | 2.04  | 0.04 |
| D14Ert449e       | <a href="#">NM_025311</a>    | 0.00 | 2.03  | 0.10 |
| Zfp568           | <a href="#">NM_001033355</a> | 0.00 | 2.03  | 0.22 |
| LOC384742        | <a href="#">XM_357835</a>    | 0.00 | 2.03  | 0.04 |
| 2810422J05Rik    | <a href="#">XM_284425</a>    | 0.00 | 2.02  | 0.05 |
| D17H6S56E-5      | <a href="#">NM_033075</a>    | 0.00 | 2.02  | 0.33 |
| OTTMUSG000000013 | <a href="#">NR_003564</a>    | 0.00 | 2.01  | 0.18 |
| Pes1             | <a href="#">NM_022889</a>    | 0.00 | 2.01  | 0.07 |
| Clspn            | <a href="#">NM_175554</a>    | 0.00 | 2.00  | 0.06 |
| Zfp326           | <a href="#">NM_018759</a>    | 0.00 | 2.00  | 0.06 |
| Nap111           | <a href="#">NM_015781</a>    | 0.00 | 2.00  | 0.05 |
| Krt42            | <a href="#">NM_212483</a>    | 0.00 | 2.00  | 0.06 |
| Rab11fip5        | <a href="#">NM_001003955</a> | 0.00 | -2.00 | 0.09 |
| Anxa2            | <a href="#">NM_007585</a>    | 0.00 | -2.00 | 0.03 |
| Ide              | <a href="#">AK029089</a>     | 0.00 | -2.00 | 0.13 |
| Txnip            | <a href="#">NM_023719</a>    | 0.00 | -2.00 | 0.03 |
| Senp7            | <a href="#">NM_001003971</a> | 0.00 | -2.01 | 0.20 |
| Otx2             | <a href="#">NM_144841</a>    | 0.02 | -2.01 | 0.06 |
| Apcdd1           | <a href="#">NM_133237</a>    | 0.00 | -2.01 | 0.12 |
| Camk2n1          | <a href="#">NM_025451</a>    | 0.00 | -2.02 | 0.14 |
| App              | <a href="#">NM_007471</a>    | 0.00 | -2.02 | 0.19 |
| D630014A15Rik    |                              | 0.00 | -2.02 | 0.14 |
| Kcnab2           | <a href="#">NM_010598</a>    | 0.00 | -2.02 | 0.06 |
| Terf2            | <a href="#">NM_009353</a>    | 0.00 | -2.02 | 0.01 |

|               |                              |      |       |      |
|---------------|------------------------------|------|-------|------|
| Prkcb1        | <a href="#">NM_008855</a>    | 0.00 | -2.02 | 0.14 |
| Pip4k2a       | <a href="#">NM_008845</a>    | 0.00 | -2.03 | 0.05 |
| Terf2         | <a href="#">NM_009353</a>    | 0.00 | -2.03 | 0.15 |
| Rims3         | <a href="#">NM_182929</a>    | 0.00 | -2.03 | 0.18 |
| 4930402H24Rik | <a href="#">NM_029432</a>    | 0.00 | -2.03 | 0.01 |
| Dhrs7         | <a href="#">NM_025522</a>    | 0.01 | -2.03 | 0.10 |
| Papolg        | <a href="#">NM_172555</a>    | 0.00 | -2.03 | 0.04 |
| Camk2n1       | <a href="#">NM_025451</a>    | 0.00 | -2.03 | 0.09 |
| LOC674004     | <a href="#">XM_001006879</a> | 0.00 | -2.04 | 0.26 |
| Al464131      | <a href="#">NM_001085515</a> | 0.00 | -2.04 | 0.05 |
| Stau2         | <a href="#">NM_025303</a>    | 0.00 | -2.05 | 0.06 |
| Srprb         | <a href="#">NM_009275</a>    | 0.00 | -2.05 | 0.30 |
| Slc1a5        | <a href="#">NM_009201</a>    | 0.02 | -2.05 | 0.17 |
| Vps54         | <a href="#">NM_139061</a>    | 0.00 | -2.05 | 0.07 |
| Adfp          | <a href="#">NM_007408</a>    | 0.00 | -2.05 | 0.06 |
| Napsa         | <a href="#">NM_008437</a>    | 0.00 | -2.05 | 0.06 |
| Dnajc6        | <a href="#">NM_198412</a>    | 0.00 | -2.06 | 0.02 |
| Ccdc57        | <a href="#">NM_027745</a>    | 0.00 | -2.06 | 0.28 |
| Napsa         | <a href="#">NM_008437</a>    | 0.00 | -2.06 | 0.11 |
| Gzmm          | <a href="#">NM_008504</a>    | 0.03 | -2.06 | 0.16 |
| Itga5         | <a href="#">NM_010577</a>    | 0.00 | -2.06 | 0.04 |
| Adssl1        | <a href="#">NM_007421</a>    | 0.00 | -2.06 | 0.04 |
| Lrrc51        | <a href="#">XM_890234</a>    | 0.00 | -2.07 | 0.05 |
| Ypel5         | <a href="#">NM_027166</a>    | 0.00 | -2.07 | 0.03 |
| Ets2          | <a href="#">NM_011809</a>    | 0.00 | -2.08 | 0.10 |
| Tmem110       | <a href="#">NM_028839</a>    | 0.00 | -2.08 | 0.10 |
| Ncam1         | <a href="#">NM_001081445</a> | 0.01 | -2.09 | 0.08 |
| Fez1          | <a href="#">NM_183171</a>    | 0.00 | -2.09 | 0.08 |
| Hmgn3         | <a href="#">NM_175074</a>    | 0.00 | -2.10 | 0.11 |
| Napsa         | <a href="#">NM_008437</a>    | 0.00 | -2.10 | 0.12 |
| Ush1c         | <a href="#">NM_153677</a>    | 0.00 | -2.10 | 0.23 |
| D030028O16Rik | <a href="#">NM_145984</a>    | 0.00 | -2.11 | 0.24 |
| LOC100043402  | <a href="#">XM_001479915</a> | 0.01 | -2.11 | 0.23 |
| Abca3         | <a href="#">NM_013855</a>    | 0.00 | -2.11 | 0.04 |
| Fbxo15        |                              | 0.00 | -2.11 | 0.08 |
| LOC381283     | <a href="#">XM_358544</a>    | 0.00 | -2.11 | 0.09 |
| Palld         | <a href="#">XM_974900</a>    | 0.00 | -2.11 | 0.04 |
| D16Bwg1494e   | <a href="#">XM_358773</a>    | 0.00 | -2.11 | 0.13 |
| LOC633360     | <a href="#">XM_907756</a>    | 0.00 | -2.12 | 0.01 |
| Tubb2b        | <a href="#">NM_023716</a>    | 0.00 | -2.12 | 0.16 |
| Cst3          | <a href="#">NM_009976</a>    | 0.00 | -2.12 | 0.08 |
| Lamb3         | <a href="#">NM_008484</a>    | 0.00 | -2.12 | 0.09 |
| Cd59a         | <a href="#">NM_007652</a>    | 0.00 | -2.13 | 0.03 |
| Ccdc98        | <a href="#">NM_172405</a>    | 0.00 | -2.13 | 0.08 |
| Hist1h3d      | <a href="#">NM_178204</a>    | 0.00 | -2.13 | 0.10 |
| Dnajc6        | <a href="#">NM_198412</a>    | 0.00 | -2.14 | 0.07 |
| Pank3         | <a href="#">NM_145962</a>    | 0.00 | -2.14 | 0.19 |
| Tcfap2c       | <a href="#">NM_009335</a>    | 0.01 | -2.14 | 0.02 |
| Mcl1          | <a href="#">NM_008562</a>    | 0.00 | -2.14 | 0.07 |
| D9Ert392e     | <a href="#">NM_028181</a>    | 0.00 | -2.15 | 0.03 |
| Hist1h3a      | <a href="#">NM_013550</a>    | 0.01 | -2.15 | 0.16 |
| Nav1          | <a href="#">NM_173437</a>    | 0.00 | -2.15 | 0.07 |
| Pga5          | <a href="#">NM_021453</a>    | 0.00 | -2.15 | 0.09 |
| Gas6          | <a href="#">NM_019521</a>    | 0.00 | -2.15 | 0.19 |
| BC050811      | <a href="#">NM_178418</a>    | 0.00 | -2.16 | 0.16 |
| Sdf4          | <a href="#">NM_011341</a>    | 0.00 | -2.16 | 0.05 |

|               |                              |      |       |      |
|---------------|------------------------------|------|-------|------|
| Mfge8         | <a href="#">NM_001045489</a> | 0.00 | -2.16 | 0.08 |
| Spp1          | <a href="#">NM_009263</a>    | 0.00 | -2.16 | 0.06 |
| Tmem53        | <a href="#">NM_026837</a>    | 0.00 | -2.16 | 0.10 |
| Punc          | <a href="#">NM_008988</a>    | 0.00 | -2.17 | 0.14 |
| Vegfa         | <a href="#">NM_009505</a>    | 0.00 | -2.18 | 0.14 |
| Igf2          | <a href="#">NM_010514</a>    | 0.00 | -2.18 | 0.13 |
| Tnfrsf22      | <a href="#">NM_023680</a>    | 0.00 | -2.18 | 0.07 |
| AA407659      | <a href="#">NM_175352</a>    | 0.00 | -2.18 | 0.09 |
| Tcfap2c       | <a href="#">NM_009335</a>    | 0.00 | -2.18 | 0.07 |
| Mfge8         | <a href="#">NM_008594</a>    | 0.00 | -2.18 | 0.10 |
| Myo1b         | <a href="#">NM_010863</a>    | 0.00 | -2.19 | 0.15 |
| Nav1          | <a href="#">NM_173437</a>    | 0.00 | -2.19 | 0.03 |
| Rtn1          | <a href="#">NM_153457</a>    | 0.00 | -2.19 | 0.13 |
| Csnk1e        | <a href="#">NM_013767</a>    | 0.00 | -2.19 | 0.10 |
| Dner          | <a href="#">NM_152915</a>    | 0.00 | -2.20 | 0.08 |
| H2-T23        | <a href="#">NM_010398</a>    | 0.00 | -2.20 | 0.04 |
| Dazl          | <a href="#">NM_010021</a>    | 0.00 | -2.21 | 0.03 |
| 1700030C10Rik | <a href="#">XR_035444</a>    | 0.00 | -2.21 | 0.19 |
| Prnp          | <a href="#">NM_011170</a>    | 0.00 | -2.21 | 0.03 |
| Fzd5          | <a href="#">NM_022721</a>    | 0.00 | -2.21 | 0.06 |
| Cab39l        | <a href="#">NM_026908</a>    | 0.00 | -2.21 | 0.14 |
| Nme7          | <a href="#">NM_138314</a>    | 0.00 | -2.22 | 0.05 |
| 9630015D15Rik | <a href="#">NM_181401</a>    | 0.00 | -2.22 | 0.07 |
| Atp5s         | <a href="#">NM_026536</a>    | 0.00 | -2.23 | 0.01 |
| LOC386199     | <a href="#">XM_359116</a>    | 0.00 | -2.23 | 0.15 |
| Zfp288        | <a href="#">AK034574</a>     | 0.00 | -2.24 | 0.13 |
| Rnase4        | <a href="#">NM_021472</a>    | 0.00 | -2.25 | 0.09 |
| Ablim2        | <a href="#">NM_177678</a>    | 0.01 | -2.25 | 0.05 |
| Capn5         | <a href="#">NM_007602</a>    | 0.00 | -2.26 | 0.06 |
| Gpc3          | <a href="#">NM_016697</a>    | 0.00 | -2.27 | 0.11 |
| Chrna4        | <a href="#">NM_015730</a>    | 0.00 | -2.27 | 0.34 |
| Tshz3         | <a href="#">NM_172298</a>    | 0.00 | -2.28 | 0.05 |
| Tcstv3        | <a href="#">NM_153523</a>    | 0.00 | -2.28 | 0.06 |
| Hist1h3f      | <a href="#">NM_013548</a>    | 0.00 | -2.28 | 0.14 |
| 6030495B01Rik | <a href="#">AK031708</a>     | 0.00 | -2.28 | 0.07 |
| Zic3          | <a href="#">AK034780</a>     | 0.00 | -2.29 | 0.08 |
| Whrn          | <a href="#">NM_001008792</a> | 0.00 | -2.29 | 0.07 |
| Rab3d         | <a href="#">NM_031874</a>    | 0.00 | -2.29 | 0.12 |
| H2-Ab1        | <a href="#">NM_207105</a>    | 0.00 | -2.31 | 0.24 |
| Pgm2          | <a href="#">NM_028132</a>    | 0.00 | -2.31 | 0.03 |
| Tsc22d3       | <a href="#">NM_001077364</a> | 0.00 | -2.32 | 0.12 |
| Emid2         | <a href="#">NM_024474</a>    | 0.04 | -2.33 | 0.10 |
| 2410025L10Rik | <a href="#">NM_028596</a>    | 0.00 | -2.34 | 0.12 |
| 5031439G07Rik | <a href="#">XM_128281</a>    | 0.00 | -2.35 | 0.03 |
| Flot2         | <a href="#">NM_001040403</a> | 0.00 | -2.35 | 0.06 |
| Traf6         | <a href="#">NM_009424</a>    | 0.02 | -2.37 | 0.16 |
| Zwint         | <a href="#">NM_025635</a>    | 0.00 | -2.37 | 0.16 |
| Rab11fip5     | <a href="#">NM_001003955</a> | 0.04 | -2.39 | 0.22 |
| LOC100047200  | <a href="#">XM_001477632</a> | 0.04 | -2.39 | 0.11 |
| Slc32a1       | <a href="#">NM_009508</a>    | 0.00 | -2.39 | 0.06 |
| Pcsk6         | <a href="#">XM_919493</a>    | 0.00 | -2.40 | 0.05 |
| B4galnt2      | <a href="#">NM_008081</a>    | 0.00 | -2.40 | 0.05 |
| Asns          | <a href="#">NM_012055</a>    | 0.00 | -2.40 | 0.13 |
| BC046404      | <a href="#">NM_198861</a>    | 0.02 | -2.40 | 0.03 |
| Dusp16        | <a href="#">NM_130447</a>    | 0.00 | -2.42 | 0.09 |
| Plekhm3       | <a href="#">NM_001039493</a> | 0.00 | -2.43 | 0.09 |

|               |                              |      |       |      |
|---------------|------------------------------|------|-------|------|
| Tex19         | <a href="#">NM_028602</a>    | 0.00 | -2.43 | 0.04 |
| Ppil6         | <a href="#">XM_994766</a>    | 0.00 | -2.44 | 0.01 |
| Pmaip1        | <a href="#">NM_021451</a>    | 0.00 | -2.44 | 0.10 |
| Rasgrp1       | <a href="#">NM_011246</a>    | 0.00 | -2.44 | 0.13 |
| Fndc3b        | <a href="#">NM_173182</a>    | 0.00 | -2.44 | 0.17 |
| Ctgf          | <a href="#">NM_010217</a>    | 0.00 | -2.44 | 0.16 |
| Col4a2        | <a href="#">NM_009932</a>    | 0.00 | -2.44 | 0.14 |
| Loxl1         | <a href="#">NM_010729</a>    | 0.00 | -2.45 | 0.01 |
| Tmem181       | <a href="#">NM_001033178</a> | 0.04 | -2.46 | 0.06 |
| Tuft1         | <a href="#">NM_011656</a>    | 0.00 | -2.46 | 0.07 |
| 1200015N20Rik | <a href="#">NM_024244</a>    | 0.00 | -2.47 | 0.04 |
| Sox21         | <a href="#">NM_145464</a>    | 0.03 | -2.48 | 0.14 |
| Atf5          | <a href="#">NM_030693</a>    | 0.00 | -2.50 | 0.15 |
| LOC386085     | <a href="#">XM_359063</a>    | 0.00 | -2.51 | 0.09 |
| Epb4.1l3      | <a href="#">NM_013813</a>    | 0.00 | -2.52 | 0.12 |
| Ctgf          | <a href="#">NM_010217</a>    | 0.00 | -2.53 | 0.03 |
| Mmd           | <a href="#">NM_026178</a>    | 0.00 | -2.54 | 0.09 |
| LOC383491     | <a href="#">XM_357091</a>    | 0.00 | -2.54 | 0.06 |
| Col20a1       | <a href="#">XM_181390</a>    | 0.01 | -2.55 | 0.15 |
| Hspb8         | <a href="#">NM_030704</a>    | 0.00 | -2.57 | 0.06 |
| 1200015N20Rik | <a href="#">NM_024244</a>    | 0.00 | -2.58 | 0.07 |
| LOC100040525  | <a href="#">XR_031953</a>    | 0.00 | -2.59 | 0.03 |
| Fetub         | <a href="#">NM_021564</a>    | 0.00 | -2.59 | 0.12 |
| Myo6          | <a href="#">NM_001039546</a> | 0.01 | -2.62 | 0.10 |
| Reep6         | <a href="#">NM_139292</a>    | 0.00 | -2.64 | 0.04 |
| Ank3          | <a href="#">NM_170687</a>    | 0.00 | -2.64 | 0.16 |
| LOC385256     | <a href="#">XM_358153</a>    | 0.02 | -2.65 | 0.05 |
| Xpr1          | <a href="#">NM_011273</a>    | 0.00 | -2.65 | 0.06 |
| Al115600      | <a href="#">XM_001476259</a> | 0.01 | -2.67 | 0.10 |
| Gdi1          | <a href="#">NM_010273</a>    | 0.04 | -2.67 | 0.04 |
| Gdi1          | <a href="#">NM_010273</a>    | 0.00 | -2.68 | 0.05 |
| Acss2         | <a href="#">NM_019811</a>    | 0.00 | -2.69 | 0.10 |
| Lbh           | <a href="#">NM_029999</a>    | 0.03 | -2.69 | 0.09 |
| BC044804      | <a href="#">NM_178035</a>    | 0.00 | -2.70 | 0.08 |
| Zeb1          | <a href="#">NM_011546</a>    | 0.00 | -2.72 | 0.10 |
| C030002B11Rik |                              | 0.00 | -2.72 | 0.23 |
| Xpr1          | <a href="#">NM_011273</a>    | 0.00 | -2.74 | 0.09 |
| 2510022D24Rik | <a href="#">XM_001004662</a> | 0.00 | -2.76 | 0.01 |
| BC050196      | <a href="#">NM_201374</a>    | 0.00 | -2.76 | 0.09 |
| Mmp2          | <a href="#">NM_008610</a>    | 0.00 | -2.76 | 0.04 |
| 1810015C04Rik | <a href="#">NM_025459</a>    | 0.00 | -2.77 | 0.06 |
| Cbln1         | <a href="#">NM_019626</a>    | 0.00 | -2.77 | 0.09 |
| Chmp2a        | <a href="#">NM_026885</a>    | 0.00 | -2.82 | 0.15 |
| 1700024G10Rik | <a href="#">XM_910148</a>    | 0.00 | -2.83 | 0.20 |
| Vamp4         | <a href="#">NM_016796</a>    | 0.00 | -2.84 | 0.10 |
| 6230400G14Rik |                              | 0.00 | -2.87 | 0.19 |
| Slc25a20      | <a href="#">NM_020520</a>    | 0.00 | -2.88 | 0.08 |
| Taf7l         | <a href="#">NM_028958</a>    | 0.00 | -2.90 | 0.06 |
| Gdi1          | <a href="#">NM_010273</a>    | 0.00 | -2.96 | 0.03 |
| Nt5e          | <a href="#">NM_011851</a>    | 0.00 | -3.02 | 0.05 |
| Cpe           | <a href="#">NM_013494</a>    | 0.01 | -3.04 | 0.07 |
| Ovgp1         | <a href="#">NM_007696</a>    | 0.00 | -3.06 | 0.02 |
| App           | <a href="#">NM_007471</a>    | 0.00 | -3.08 | 0.13 |
| Fstl1         | <a href="#">NM_008047</a>    | 0.00 | -3.09 | 0.07 |
| Amy2-2        | <a href="#">NM_001042711</a> | 0.00 | -3.10 | 0.06 |
| Arih2         | <a href="#">NM_011790</a>    | 0.00 | -3.10 | 0.18 |

|                  |                              |      |       |      |
|------------------|------------------------------|------|-------|------|
| Nanogpd          | <a href="#">NM_001080945</a> | 0.00 | -3.11 | 0.11 |
| 8030474K03Rik    | <a href="#">XM_001000772</a> | 0.00 | -3.13 | 0.12 |
| Clgn             | <a href="#">NM_009904</a>    | 0.00 | -3.14 | 0.16 |
| Btg4             | <a href="#">NM_019493</a>    | 0.00 | -3.15 | 0.17 |
| Gch1             | <a href="#">NM_008102</a>    | 0.00 | -3.18 | 0.21 |
| Copz2            | <a href="#">NM_019877</a>    | 0.00 | -3.23 | 0.08 |
| Tgm2             | <a href="#">NM_009373</a>    | 0.00 | -3.44 | 0.03 |
| LOC212386        | <a href="#">XM_142890</a>    | 0.03 | -3.45 | 0.16 |
| Srgap3           | <a href="#">NM_080448</a>    | 0.00 | -3.46 | 0.04 |
| Fos              | <a href="#">NM_010234</a>    | 0.01 | -3.48 | 0.08 |
| 2310009E04Rik    | <a href="#">XM_131496</a>    | 0.00 | -3.48 | 0.01 |
| Aldh1l2          | <a href="#">NM_153543</a>    | 0.01 | -3.52 | 0.14 |
| Ddx3y            | <a href="#">NM_012008</a>    | 0.00 | -3.54 | 0.07 |
| ENSMUSG000000740 | <a href="#">XM_001475386</a> | 0.00 | -3.55 | 0.10 |
| Copz2            | <a href="#">NM_019877</a>    | 0.03 | -3.61 | 0.05 |
| LOC100041103     | <a href="#">XM_001476013</a> | 0.00 | -3.81 | 0.07 |
| Susd4            | <a href="#">NM_144796</a>    | 0.00 | -3.87 | 0.21 |
| Crtac1           | <a href="#">NM_145123</a>    | 0.00 | -3.94 | 0.06 |
| H2-BI            | <a href="#">NM_008199</a>    | 0.00 | -3.95 | 0.17 |
| H3f3b            | <a href="#">XM_915849</a>    | 0.05 | -4.16 | 0.04 |
| 9130213B05Rik    | <a href="#">NM_145562</a>    | 0.00 | -4.30 | 0.10 |
| Pygl             | <a href="#">NM_133198</a>    | 0.00 | -4.47 | 0.05 |
| Gm397            | <a href="#">NM_001013765</a> | 0.00 | -4.95 | 0.09 |
| LOC381844        | <a href="#">XM_355857</a>    | 0.00 | -7.26 | 0.03 |
