# Supplementary material
Source: PubMed Central journal article supplement (PMC3572291)
Supplement: NIHMS428118-supplement-Supp_Table_S3.pdf [file NIHMS428118-supplement-Supp_Table_S3.pdf]

**Table S3. RT-PCR primers used in this study**

| Gene        | PCR primer sequence (5' to 3')    |                                        |
|-------------|-----------------------------------|----------------------------------------|
|             | Forward                           | Reverse                                |
| Tcea1       | gct aga atg aca gca gag gaa       | gtt gtc att ggt tca tca gca            |
| Tcea2       | gcg gcg gaa tgt gct gtg tgg       | gtc tgt ctg cgt gcc gcc agt            |
| Tcea3       | cag gaa ccc agg cct gag gcg       | gct aca ccg caa gag gtc agt gg         |
| Lefty1      | gct cac aca agt tgg ttc gtt tc    | cct ccc tcc ttc acg ctg ac             |
| Oct4        | ctg agg gcc agg cag gag cac gag   | ctg tag gga ggg ctt cgg gca ctt        |
| Sox2        | ggt tac ctc ttc ctc cca ctc cag   | tca cat gtg cga cag ggg cag            |
| c-Myc       | cag agg agg aac gag ctg aag cgc   | tta tgc acc aga gtt tcg aag ctg ttc g  |
| Sox1        | tta ctt ccc gcc agc tct tc        | tga tgc att ttg ggg gta tct ctc        |
| Otx2        | cca tga cct ata ctc agg ctt cag g | gaa gct cca tat ccc tgg gtg gaa ag     |
| Fgf5        | tct cac tcc cga agg gca a         | aga tct gca gat gga aac c              |
| Nestin      | ctg cag gcc act gaa aag t         | ttc cag gat ctg agc gat ct             |
| Calbindin   | gct tct atc tgg cgg aag g         | tgt cat ctg gct acc ttc cc             |
| VE-cadherin | tcc tct gca tcc tca cta tca ca    | gta agt gac caa ctg ctc gtg aat        |
| Cebpa       | ccg act tct acg agg tgg ag        | tgg cct tct cct gct gtc                |
| Sox18       | aac aaa atc cgg atc tgc ac        | cga ggc cgg tac ttg tag tt             |
| Mixl1       | act ttc cag ctc ttt caa gag cc    | att gtg tac tcc cca act ttc cc         |
| Gsc         | acc atc ttc acc gat gag cag c     | ctt ggc tcg gcg gtt ctt aaa c          |
| Lhx1        | aag ccc aca cgc cat atc cg        | gct gtt tca tcc ttc gct cct tg         |
| Dab2        | ggc aac agg ctg aac cat tag t     | ttg gtg tcg att tca gag ttt aga t      |
| Gata4       | gat ggg acg gga cac tac ctg       | acc tgc tgg cgt ctt aga ttt            |
| Gata6       | aca gcc cac ttc tgt gtt ccc       | gtg ggt tgg tca cgt ggt aca g          |
| Afp         | cac acc cgc ttc cct cat cc        | ttc ttc tcc gtc acg cac tgg            |
| Cxcr4       | tcc aac aag gaa ccc tgc ttc       | ttg ccg act atg cca gtc aag            |
| Mash2       | ggg atc tgc act cga gga ttt       | cgt cca tca agc ttg cat tca            |
| Ehox        | ttc ggt ttt cac aac ctc agg aa    | taa ctc gag ctt ctg aag tgc tct ctc tt |
| Cdx2        | cct gcg aca agg gct tgt tta g     | tcc cga ctt ccc ttc acc ata c          |
| Eomes       | cct ggt ggt gtt ttg ttg tg        | ttt aat agc acc ggg cac tc             |
| Gapdh       | ggg tgt gaa cca tga gaa           | gtc ttc tgg gtg gca gtg at             |
